# Supplementary material
Source: PubMed Central journal article supplement (PMC2274776)
Supplement: NIHMS32956-supplement-01.pdf [file NIHMS32956-supplement-01.pdf]

|        |                                                            |                                                            |
|--------|------------------------------------------------------------|------------------------------------------------------------|
| N-term | A1                                                         | GADPGYLLEFMDWGTLQTLGGVNHSTSIGKIWLTVLFIF                    |
|        | A2                                                         | GADPGYLLEFMDWGTLQTLGGVNHSTSIGKIWLTVLFIF                    |
|        | A3                                                         | GADPGYLLEFMDWGTLQTLGGVNHSTSIGKIWLTVLFIF                    |
|        | A4                                                         | GADPGYLLEFMDWGTLQTLGGVNHSTSIGKIWLTVLFIF                    |
|        | A5                                                         | GADPGYLLEFMDWGTLQTLGGVNHSTSIGKIWLTVLFIF                    |
|        | A6                                                         | GADPGYLLEFMDWGTLQTLGGVNHSTSIGKIWLTVLFIF                    |
|        | A7                                                         | GADPGYLLEFMDWGTLQTLGGVNHSTSIGKIWLTVLFIF                    |
|        | A8                                                         | GADPGYLLEFMDWGTLQTLGGVNHSTSIGKIWLTVLFIF                    |
|        | A9                                                         | GADPGYLLEFMDWGTLQTLGGVNHSTSIGKIWLTVLFIF                    |
|        | A10                                                        | GADPGYLLEFMDWGTLQTLGGVNHSTSIGKIWLTVLFIF                    |
|        | A11                                                        | GADPGYLLEFMDWGTLQTLGGVNHSTSIGKIWLTVLFIF                    |
|        | A12                                                        | GADPGYLLEFMDWGTLQTLGGVNHSTSIGKIWLTVLFIF                    |
|        | B1                                                         | GADPGYLLEFMDWGTLQTLGGVNHSTSIGKIWLTVLFIF                    |
|        | B2                                                         | GADPGYLLEFMDWGTLQTLGGVNHSTSIGKIWLTVLFIF                    |
| B3     | GADPGYLLEFMDWGTLQTLGGVNHSTSIGKIWLTVLFIF                    |                                                            |
| B4     | GADPGYLLEFMDWGTLQTLGGVNHSTSIGKIWLTVLFIF                    |                                                            |
| B5     | GADPGYLLEFMDWGTLQTLGGVNHSTSIGKIWLTVLFIF                    |                                                            |
| B6     | GADPGYLLEFMDWGTLQTLGGVNHSTSIGKIWLTVLFIF                    |                                                            |
| B7     | GADPGYLLEFMDWGTLQTLGGVNHSTSIGKIWLTVLFIF                    |                                                            |
| 1EL    | B8                                                         | RIMILVAAKEVWGDEQADFVCNTLQPGCKNVCYDHYFPISHIRLWALQLIFV       |
|        | B9                                                         | RIMILVAAKEVWGDEQADFVCNTLQPGCKNVCYDHYFPISHIRLWALQLIFV       |
|        | B10                                                        | RIMILVAAKEVWGDEQADFVCNTLQPGCKNVCYDHYFPISHIRLWALQLIFV       |
|        | B11                                                        | RIMILVAAKEVWGDEQADFVCNTLQPGCKNVCYDHYFPISHIRLWALQLIFV       |
|        | B12                                                        | RIMILVAAKEVWGDEQADFVCNTLQPGCKNVCYDHYFPISHIRLWALQLIFV       |
|        | C1                                                         | RIMILVAAKEVWGDEQADFVCNTLQPGCKNVCYDHYFPISHIRLWALQLIFV       |
|        | C2                                                         | RIMILVAAKEVWGDEQADFVCNTLQPGCKNVCYDHYFPISHIRLWALQLIFV       |
|        | C3                                                         | RIMILVAAKEVWGDEQADFVCNTLQPGCKNVCYDHYFPISHIRLWALQLIFV       |
|        | C4                                                         | RIMILVAAKEVWGDEQADFVCNTLQPGCKNVCYDHYFPISHIRLWALQLIFV       |
|        | C5                                                         | RIMILVAAKEVWGDEQADFVCNTLQPGCKNVCYDHYFPISHIRLWALQLIFV       |
|        | C6                                                         | RIMILVAAKEVWGDEQADFVCNTLQPGCKNVCYDHYFPISHIRLWALQLIFV       |
|        | C7                                                         | RIMILVAAKEVWGDEQADFVCNTLQPGCKNVCYDHYFPISHIRLWALQLIFV       |
|        | C8                                                         | RIMILVAAKEVWGDEQADFVCNTLQPGCKNVCYDHYFPISHIRLWALQLIFV       |
|        | C9                                                         | RIMILVAAKEVWGDEQADFVCNTLQPGCKNVCYDHYFPISHIRLWALQLIFV       |
| C10    | RIMILVAAKEVWGDEQADFVCNTLQPGCKNVCYDHYFPISHIRLWALQLIFV       |                                                            |
| C11    | RIMILVAAKEVWGDEQADFVCNTLQPGCKNVCYDHYFPISHIRLWALQLIFV       |                                                            |
| C12    | RIMILVAAKEVWGDEQADFVCNTLQPGCKNVCYDHYFPISHIRLWALQLIFV       |                                                            |
| D1     | RIMILVAAKEVWGDEQADFVCNTLQPGCKNVCYDHYFPISHIRLWALQLIFV       |                                                            |
| D2     | RIMILVAAKEVWGDEQADFVCNTLQPGCKNVCYDHYFPISHIRLWALQLIFV       |                                                            |
| IL     | D3                                                         | STPALLVAMHVA YRRHEKKRKF IKG EIKSEFKDIEEIKTQKVRIEGLWWTYTSSI |
|        | D4                                                         | STPALLVAMHVA YRRHEKKRKF IKG EIKSEFKDIEEIKTQKVRIEGLWWTYTSSI |
|        | D5                                                         | STPALLVAMHVA YRRHEKKRKF IKG EIKSEFKDIEEIKTQKVRIEGLWWTYTSSI |
|        | D6                                                         | STPALLVAMHVA YRRHEKKRKF IKG EIKSEFKDIEEIKTQKVRIEGLWWTYTSSI |
|        | D7                                                         | STPALLVAMHVA YRRHEKKRKF IKG EIKSEFKDIEEIKTQKVRIEGLWWTYTSSI |
|        | D8                                                         | STPALLVAMHVA YRRHEKKRKF IKG EIKSEFKDIEEIKTQKVRIEGLWWTYTSSI |
|        | D9                                                         | STPALLVAMHVA YRRHEKKRKF IKG EIKSEFKDIEEIKTQKVRIEGLWWTYTSSI |
|        | D10                                                        | STPALLVAMHVA YRRHEKKRKF IKG EIKSEFKDIEEIKTQKVRIEGLWWTYTSSI |
|        | D11                                                        | STPALLVAMHVA YRRHEKKRKF IKG EIKSEFKDIEEIKTQKVRIEGLWWTYTSSI |
|        | D12                                                        | STPALLVAMHVA YRRHEKKRKF IKG EIKSEFKDIEEIKTQKVRIEGLWWTYTSSI |
|        | E1                                                         | STPALLVAMHVA YRRHEKKRKF IKG EIKSEFKDIEEIKTQKVRIEGLWWTYTSSI |
|        | E2                                                         | STPALLVAMHVA YRRHEKKRKF IKG EIKSEFKDIEEIKTQKVRIEGLWWTYTSSI |
|        | E3                                                         | STPALLVAMHVA YRRHEKKRKF IKG EIKSEFKDIEEIKTQKVRIEGLWWTYTSSI |
| E4     | STPALLVAMHVA YRRHEKKRKF IKG EIKSEFKDIEEIKTQKVRIEGLWWTYTSSI |                                                            |
| E5     | STPALLVAMHVA YRRHEKKRKF IKG EIKSEFKDIEEIKTQKVRIEGLWWTYTSSI |                                                            |
| E6     | STPALLVAMHVA YRRHEKKRKF IKG EIKSEFKDIEEIKTQKVRIEGLWWTYTSSI |                                                            |
| E7     | STPALLVAMHVA YRRHEKKRKF IKG EIKSEFKDIEEIKTQKVRIEGLWWTYTSSI |                                                            |
| E8     | STPALLVAMHVA YRRHEKKRKF IKG EIKSEFKDIEEIKTQKVRIEGLWWTYTSSI |                                                            |
| E9     | STPALLVAMHVA YRRHEKKRKF IKG EIKSEFKDIEEIKTQKVRIEGLWWTYTSSI |                                                            |

|        |     |                                                            |
|--------|-----|------------------------------------------------------------|
| 2EL    | E10 | FFRVIFEAAFMYVFYVMYDGFMSQRLVKCNAWPCPNTVDCFVSRPTEKTVFTVFMAIV |
|        | E11 | FFRVIFEAAFMYVFYVMYDGFMSQRLVKCNAWPCPNTVDCFVSRPTEKTVFTVFMAIV |
|        | E12 | FFRVIFEAAFMYVFYVMYDGFMSQRLVKCNAWPCPNTVDCFVSRPTEKTVFTVFMAIV |
|        | F1  | FFRVIFEAAFMYVFYVMYDGFMSQRLVKCNAWPCPNTVDCFVSRPTEKTVFTVFMAIV |
|        | F2  | FFRVIFEAAFMYVFYVMYDGFMSQRLVKCNAWPCPNTVDCFVSRPTEKTVFTVFMAIV |
|        | F3  | FFRVIFEAAFMYVFYVMYDGFMSQRLVKCNAWPCPNTVDCFVSRPTEKTVFTVFMAIV |
|        | F4  | FFRVIFEAAFMYVFYVMYDGFMSQRLVKCNAWPCPNTVDCFVSRPTEKTVFTVFMAIV |
|        | F5  | FFRVIFEAAFMYVFYVMYDGFMSQRLVKCNAWPCPNTVDCFVSRPTEKTVFTVFMAIV |
|        | F6  | FFRVIFEAAFMYVFYVMYDGFMSQRLVKCNAWPCPNTVDCFVSRPTEKTVFTVFMAIV |
|        | F7  | FFRVIFEAAFMYVFYVMYDGFMSQRLVKCNAWPCPNTVDCFVSRPTEKTVFTVFMAIV |
|        | F8  | FFRVIFEAAFMYVFYVMYDGFMSQRLVKCNAWPCPNTVDCFVSRPTEKTVFTVFMAIV |
|        | F9  | FFRVIFEAAFMYVFYVMYDGFMSQRLVKCNAWPCPNTVDCFVSRPTEKTVFTVFMAIV |
|        | F10 | FFRVIFEAAFMYVFYVMYDGFMSQRLVKCNAWPCPNTVDCFVSRPTEKTVFTVFMAIV |
|        | F11 | FFRVIFEAAFMYVFYVMYDGFMSQRLVKCNAWPCPNTVDCFVSRPTEKTVFTVFMAIV |
|        | F12 | FFRVIFEAAFMYVFYVMYDGFMSQRLVKCNAWPCPNTVDCFVSRPTEKTVFTVFMAIV |
|        | G1  | FFRVIFEAAFMYVFYVMYDGFMSQRLVKCNAWPCPNTVDCFVSRPTEKTVFTVFMAIV |
|        | G2  | FFRVIFEAAFMYVFYVMYDGFMSQRLVKCNAWPCPNTVDCFVSRPTEKTVFTVFMAIV |
|        | G3  | FFRVIFEAAFMYVFYVMYDGFMSQRLVKCNAWPCPNTVDCFVSRPTEKTVFTVFMAIV |
|        | G4  | FFRVIFEAAFMYVFYVMYDGFMSQRLVKCNAWPCPNTVDCFVSRPTEKTVFTVFMAIV |
|        |     |                                                            |
| C-term | G5  | SGICILLNVT ELCYLLIRYCSGKSKKPVGGGHHHHHH                     |
|        | G6  | SGICILLNVT ELCYLLIRYCSGKSKKPVGGGHHHHHH                     |
|        | G7  | SGICILLNVT ELCYLLIRYCSGKSKKPVGGGHHHHHH                     |
|        | G8  | SGICILLNVT ELCYLLIRYCSGKSKKPVGGGHHHHHH                     |
|        | G9  | SGICILLNVT ELCYLLIRYCSGKSKKPVGGGHHHHHH                     |
|        | G10 | SGICILLNVT ELCYLLIRYCSGKSKKPVGGGHHHHHH                     |
|        | G11 | SGICILLNVT ELCYLLIRYCSGKSKKPVGGGHHHHHH                     |
|        | G12 | SGICILLNVT ELCYLLIRYCSGKSKKPVGGGHHHHHH                     |
|        | H1  | SGICILLNVT ELCYLLIRYCSGKSKKPVGGGHHHHHH                     |
|        | H2  | SGICILLNVT ELCYLLIRYCSGKSKKPVGGGHHHHHH                     |
|        | H3  | SGICILLNVT ELCYLLIRYCSGKSKKPVGGGHHHHHH                     |
|        | H4  | SGICILLNVT ELCYLLIRYCSGKSKKPVGGGHHHHHH                     |
|        | H5  | SGICILLNVT ELCYLLIRYCSGKSKKPVGGGHHHHHH                     |
|        | H6  | SGICILLNVT ELCYLLIRYCSGKSKKPVGGGHHHHHH                     |
|        | H7  | SGICILLNVT ELCYLLIRYCSGKSKKPVGGGHHHHHH                     |
|        | H8  | SGICILLNVT ELCYLLIRYCSGKSKKPVGGGHHHHHH                     |
|        | H9  | SGICILLNVT ELCYLLIRYCSGKSKKPVGGGHHHHHH                     |
|        | H10 | SGICILLNVT ELCYLLIRYCSGKSKKPVGGGHHHHHH                     |
|        | H11 | SGICILLNVT ELCYLLIRYCSGKSKKPVGGGHHHHHH                     |
|        | H12 | SGICILLNVT ELCYLLIRYCSGKSKKPVGGGHHHHHH                     |
